# Supplementary material
Source: PubMed Central journal article supplement (PMC2148268)

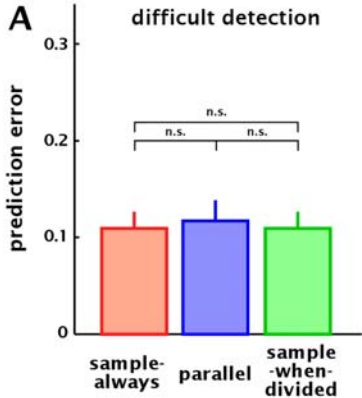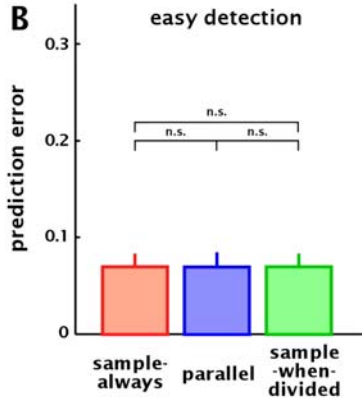

Supplement: pnas_0707316104_1.pdf [file pnas_0707316104_1.pdf]

**S1**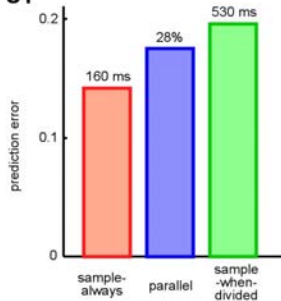

probe-aligned eye position

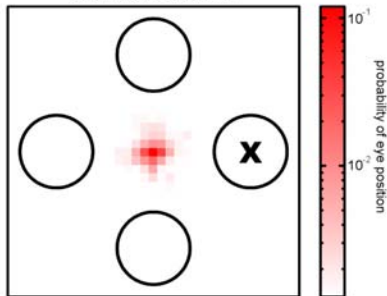**S2**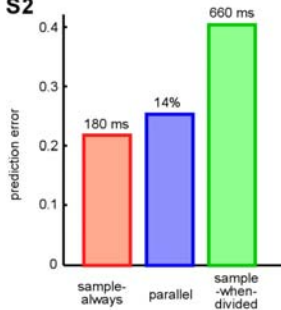

probe-aligned eye position

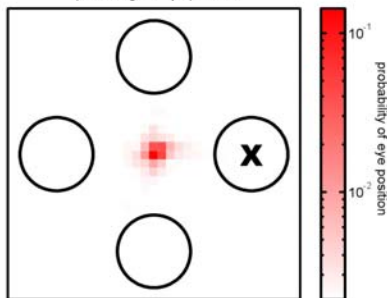

Supplement: pnas_0707316104_2.pdf [file pnas_0707316104_2.pdf]
